# Supplementary material for: Allogenic and Autologous anti-CD7 CAR-T cell Therapies in Relapsed or Refractory T-Cell Malignancies
Source: Research Square preprint supplement (doi:10.21203/rs.3.rs-2305563/v1), 2022-11-29
Supplement: Supplementary file 1 [file c46ced4c2e8c52a2bd48de96.xlsx]

## Sheet: Sheet1
Table 2. Adverse Events Within a Month Post-infusion
Adverse events	Grade 1	Grade 2	Grade 3	Grade 4	Total patients
CRS
Total score	3（30）	4（40）	1（10）	0	8（80）
Fever	3（30）	4（40）	1（10）	0	7（70）
Hypoxia	0	3（30）	1（10）	0	4（40）
Hypotension	0	2（20）	1（10）	0	3（30）
ICANS
Total score	0	0	0	0	0
GVHD
Total score	1（10）	1（10）	0	0	2（20）
Skin	1（10）	1（10）	0	0	2（20）
Intestinal	0	1（10）	0	0	1（10）
Liver	0	0	0	0
Hematological Event
Anemia	1（10）	0	3（30）	0	4（40）
Thrombocytopenia	2（20）	1（10）	1（10）	5（50）	4（40）
Leukopenia	0	0	0	9（90）	9（90）
Neutropenia	0	0	0	9（90）	9（90）
Lymphocytopenia	0	0	0	9（90）	9（90）
Infection
Total scores	0	0	5（50）	0	4（40）
Virus	0	0	1（10）	0	1（10）
Bacteria	0	0	3（30）	0	3（30）
Fungus	0	0	1（10）	0	1（10）
Others
Hypoimmunoglobulinia	5（50）	0	0	0	5（50）
Capillary leak syndrome	2（20）	0	0	0	2（20）
HLH	0	0	1（10）	1（10）	2（20）
CRS, cytokine release syndrome; ICANS, immune effector cell-associated neurotoxicity syndrome; GVHD, graft-versus-host disease;
HLH, hemophagocytic lymphohistiocytosis
