# Supplementary material for: Allogenic and Autologous anti-CD7 CAR-T cell Therapies in Relapsed or Refractory T-Cell Malignancies
Source: Research Square preprint supplement (doi:10.21203/rs.3.rs-2305563/v1), 2022-11-29
Supplement: Supplementary file 1 [file e648e2a62b06899aa563a03c.pdf]

## **SUPPLEMENTARY MATERIALS**

### **Supplementary Methods**

#### ***The inclusion and exclusion criteria of clinical trial***

##### **Inclusion Criteria:**

1. Aged from 14 to 70 years;
2. Expected survival over 60 days;
3. Eastern Cooperative Oncology Group score 0-2;
4. Diagnosed as T-cell hematologic malignancies (including leukemia and lymphoma) according to WHO2016 criteria;
5. Patients must relapse or be refractory after at least two lines of therapy.
6. CD7 were positive in bone marrow or cerebrospinal fluid by immunohistochemistry or flow cytometry at screening, and one of the following conditions is satisfied:
  - A. No remission was achieved after at least 2 lines of standard therapy;
  - B. Relapse or progression after standard treatment;
  - C. Relapse after autologous or allogeneic hematopoietic stem cell transplantation;
7. Have no fertility requirements or plans for one year since enrollment in this clinical trial;
8. Patient or his or her legal guardian voluntarily participates in and signs an informed consent form.

##### **Exclusion Criteria:**

1. Complicated with central system leukemia/lymphoma with active intracranial lesions;
2. Existing or preexisting CNS conditions, such as epileptic seizures, cerebrovascular ischemia/hemorrhage, dementia, cerebellar disease, or any CNS related autoimmune disease;
3. Symptomatic heart failure or severe arrhythmias;
4. Symptoms of severe respiratory failure;
5. Complicated with other types of malignant tumors;
6. Serum creatinine and/or urea nitrogen  $\geq 1.5$  times of normal value;
7. Suffer from sepsis or other uncontrollable infections;
8. Intracranial hypertension or brain consciousness disorder;
9. Severe mental disorders;
10. Have received organ transplantation (excluding bone marrow transplantation);
11. Female patients (fertile patients) had positive blood HCG test;
12. Hepatitis (including hepatitis B and C), AIDS and syphilis were screened positive;
13. Patients with graft-versus-host disease (GVHD) or who require immunosuppressant treatment;
14. The absolute value of lymphocytes was too low to manufacture CART cells;
15. Other conditions considered inappropriate by the researcher.

### ***Single-cell RNA sequencing and analyses***

#### **Cell preparation**

Having harvested peripheral blood mononuclear cells, cell count and viability was estimated using fluorescence Cell Analyzer (Countstar® Rigel S2) with AO/PI reagent after removal erythrocytes (Miltenyi 130-094-183) and then debris and dead cells removal was decided to be performed or not (Miltenyi 130-109-398/130-090-101). Finally fresh cells were washed twice in the RPMI1640 and then resuspended at  $1 \times 10^6$  cells per ml in 1×PBS and 0.04% bovine serum albumin.

### **Single cell RNA-seq library construction and sequencing**

Single-cell RNA-seq libraries were prepared using SeekOne® DD Single Cell 5' library preparation kit (SeekGene Catalog No.). Briefly, appropriate number of cells were mixed with reverse transcription reagent and then loaded to the sample well in SeekOne® DD Chip S5. Subsequently Gel Beads and Partitioning Oil were dispensed into corresponding wells separately in chip. After emulsion droplet generation reverse transcription were performed at 53°C for 45 minutes and inactivated at 85°C for 5 minutes. Next, cDNA was purified from broken droplet and amplified in PCR reaction. The amplified cDNA product was fragmented, end repaired, A-tailed and ligated to sequencing adaptor. Finally the indexed PCR were performed to amplified the DNA representing 3' polyA part of expressing genes which also contained Cell Bar code and Unique Molecular Index. The indexed sequencing libraries were cleanup with SPRI beads, quantified by quantitative PCR (KAPA Biosystems KK4824) and then sequenced on illumina NovaSeq 6000 with PE150 read length.

# Supplementary Figures

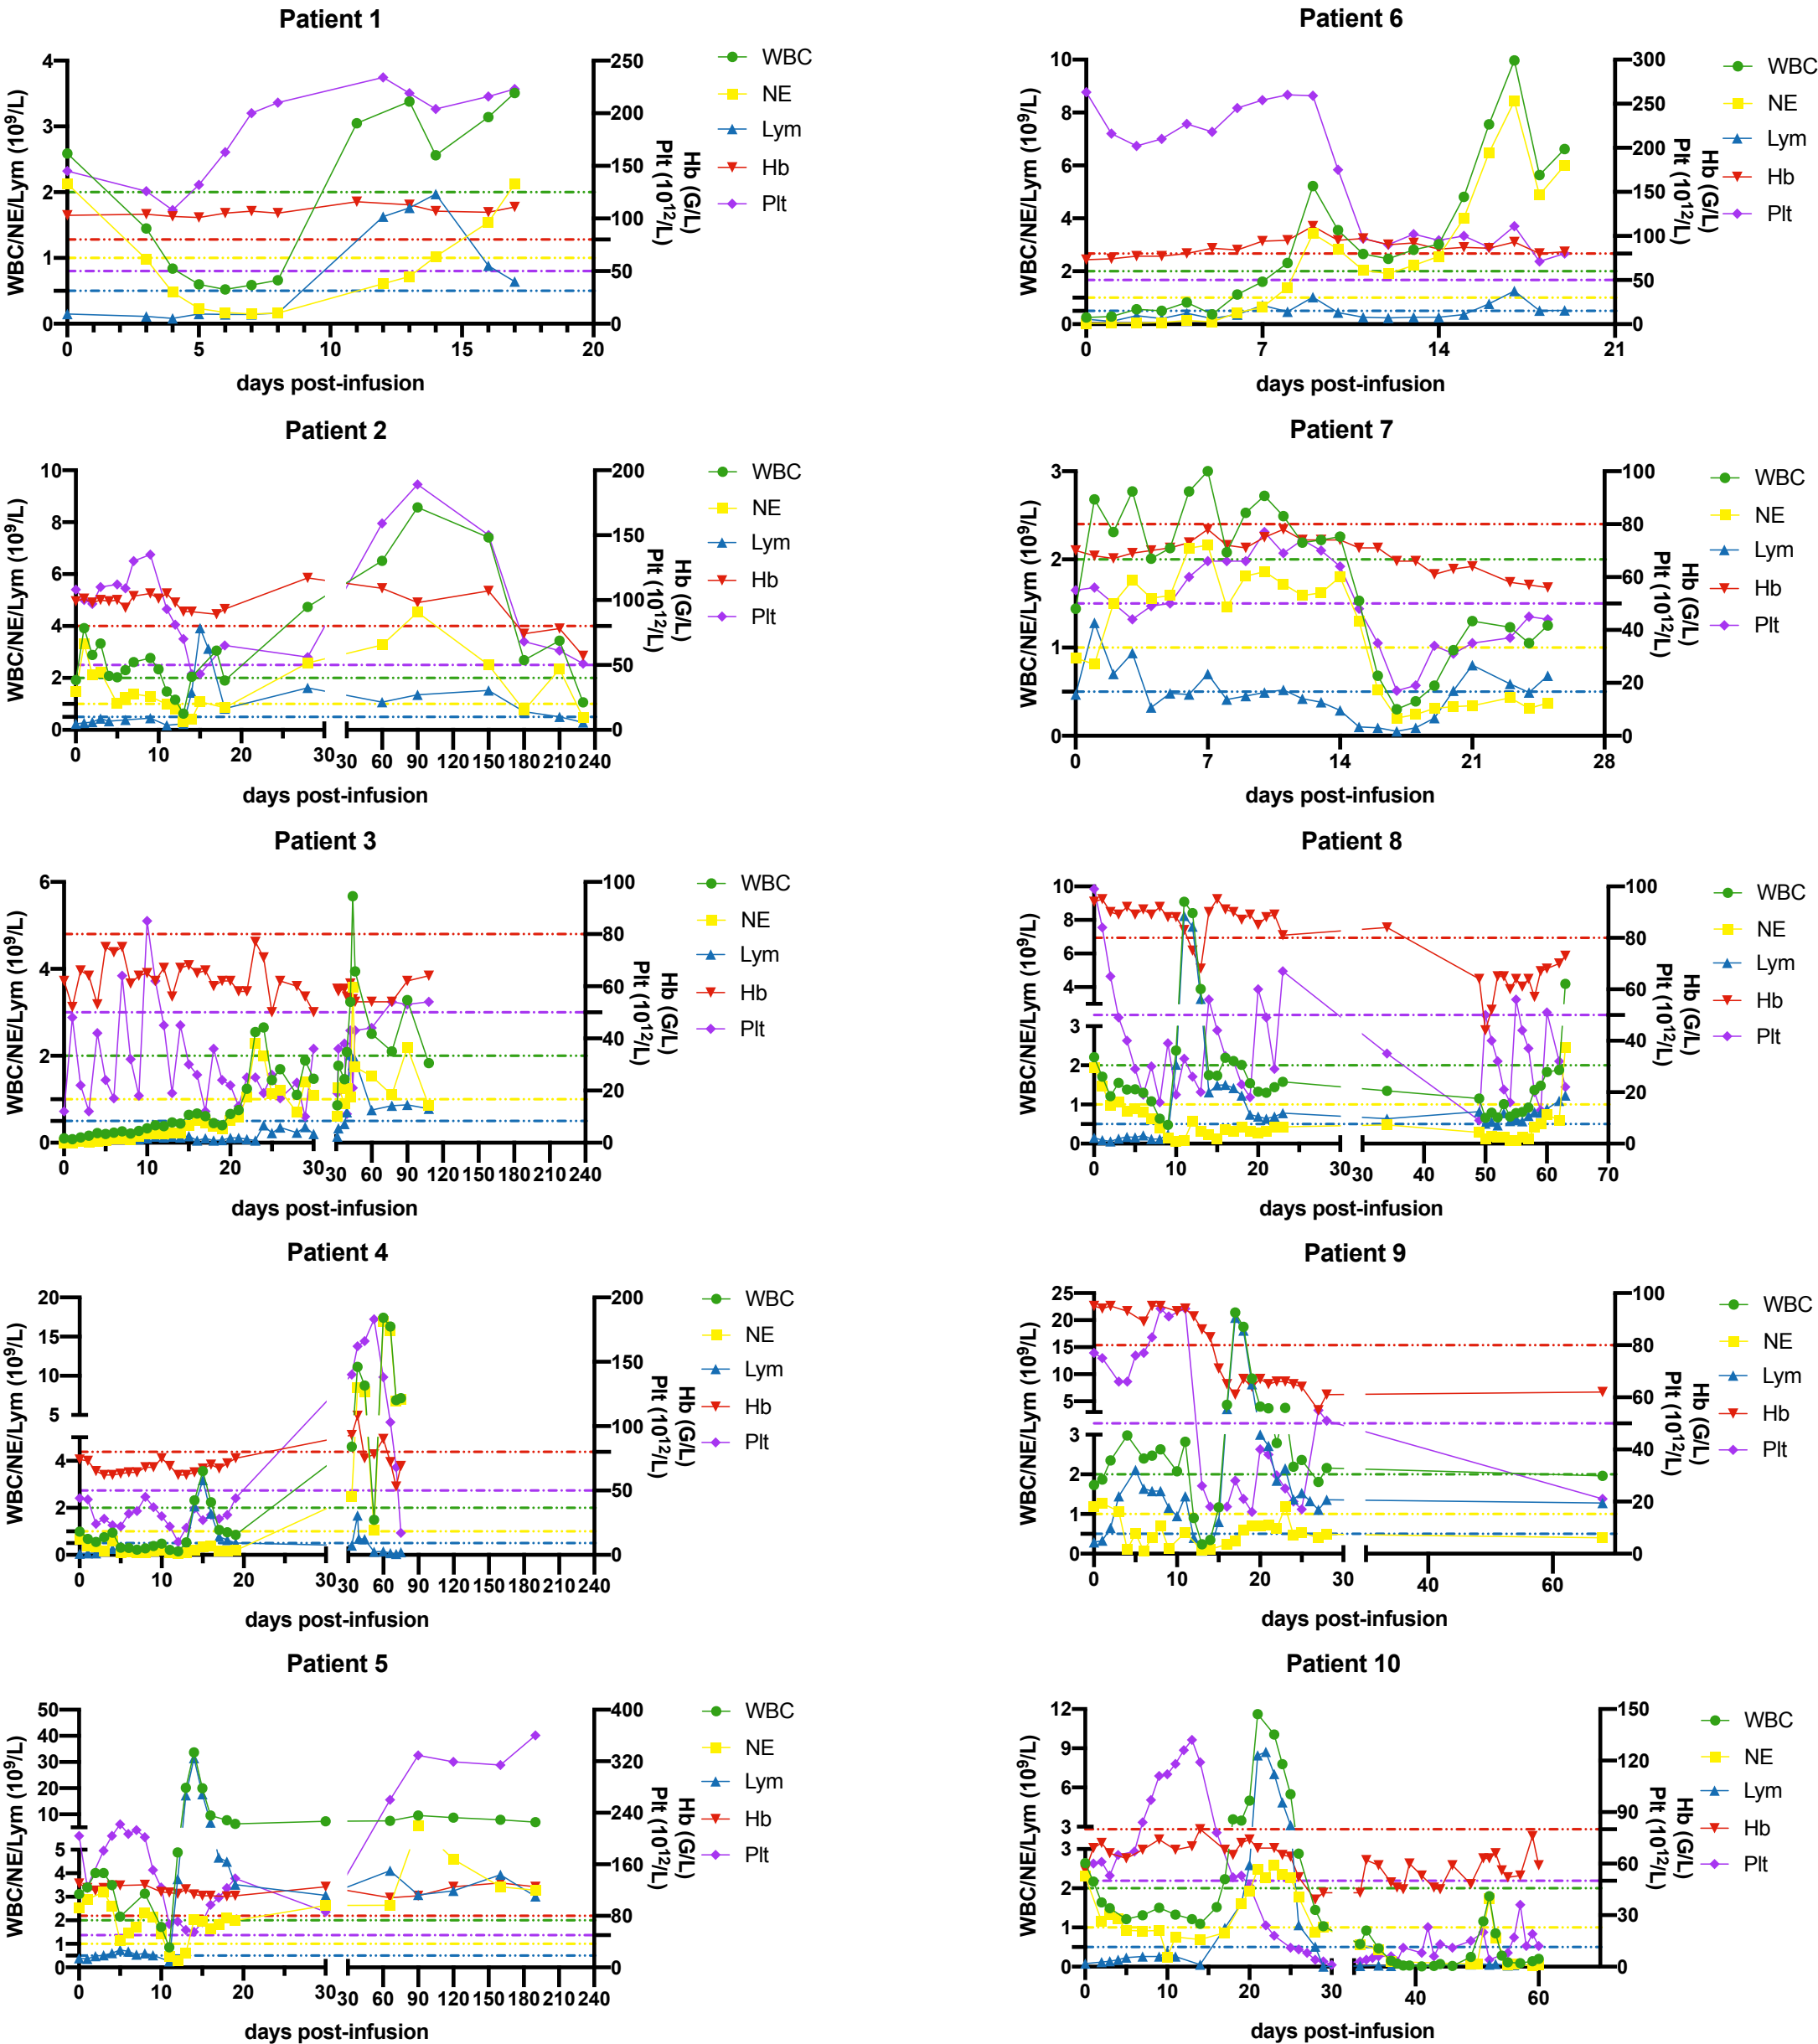

Supplementary Fig 1. Cytopenia within 30 days after infusions and prolonged hematological toxicities were presented in a plot per patient. Grids divided hematological toxicities into grade 1-2 and grade 3-4.

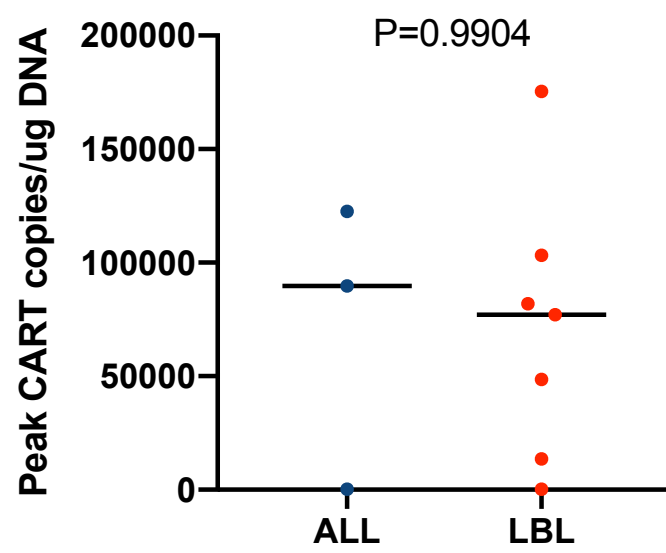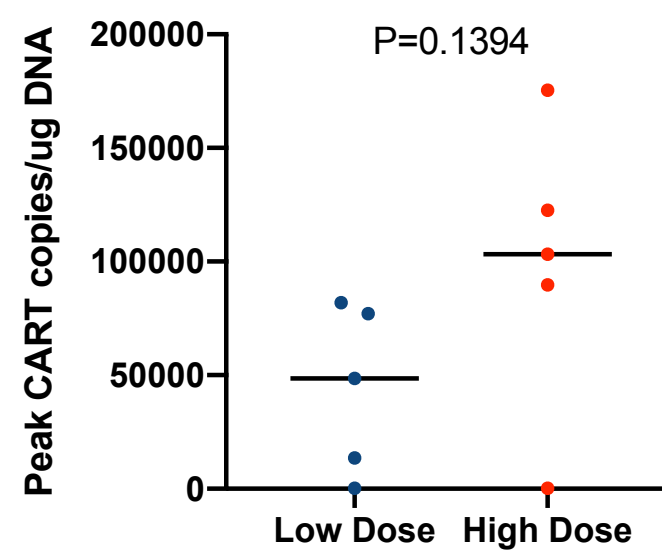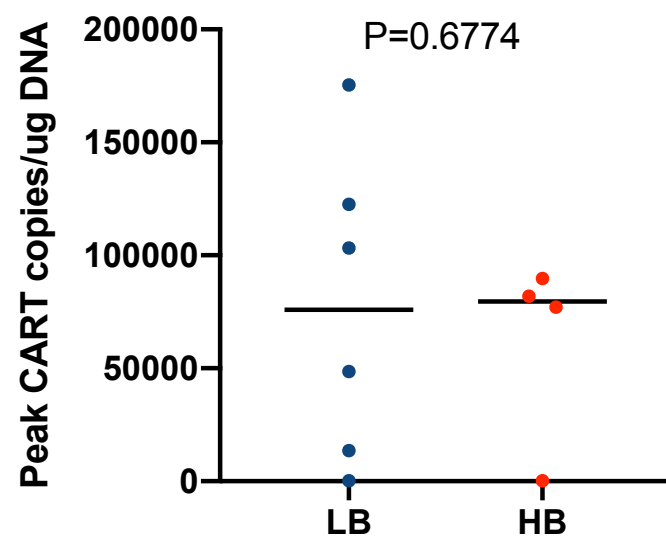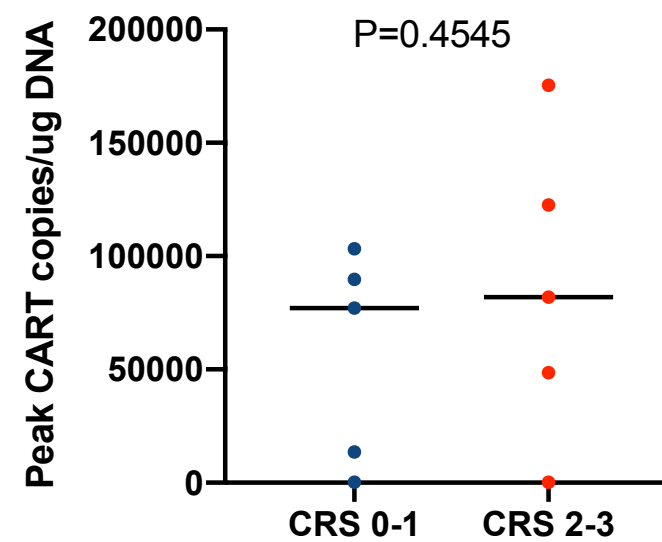

Supplementary Fig 2. Correlation of the peak CAR copies in the peripheral blood with sources, disease, tumor burden, doses, efficacy or adverse events. CRS, cytokine release symptom; LB: light tumor burden; HB: heavy tumor burden.

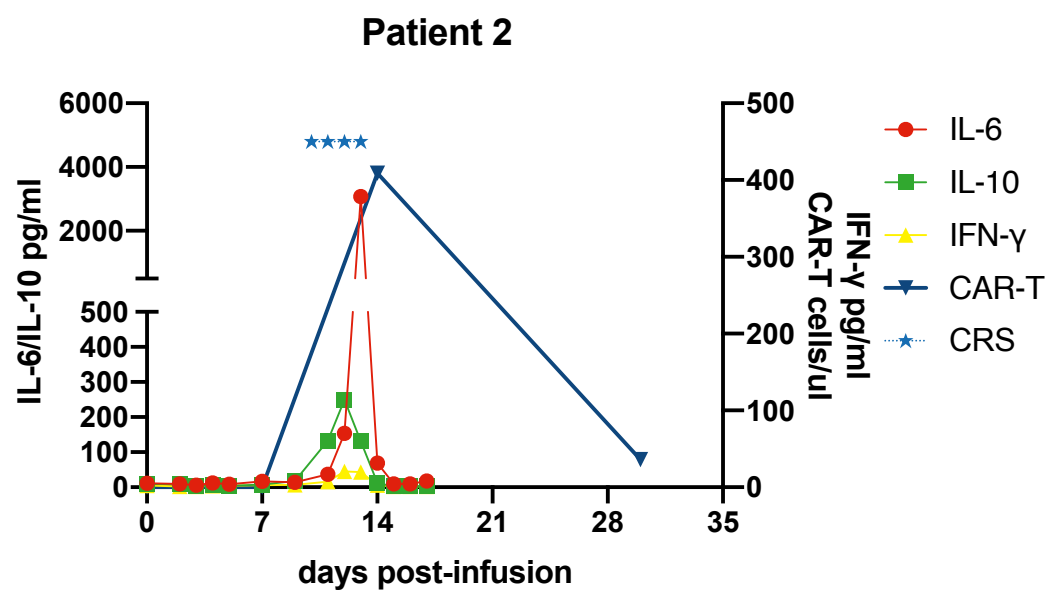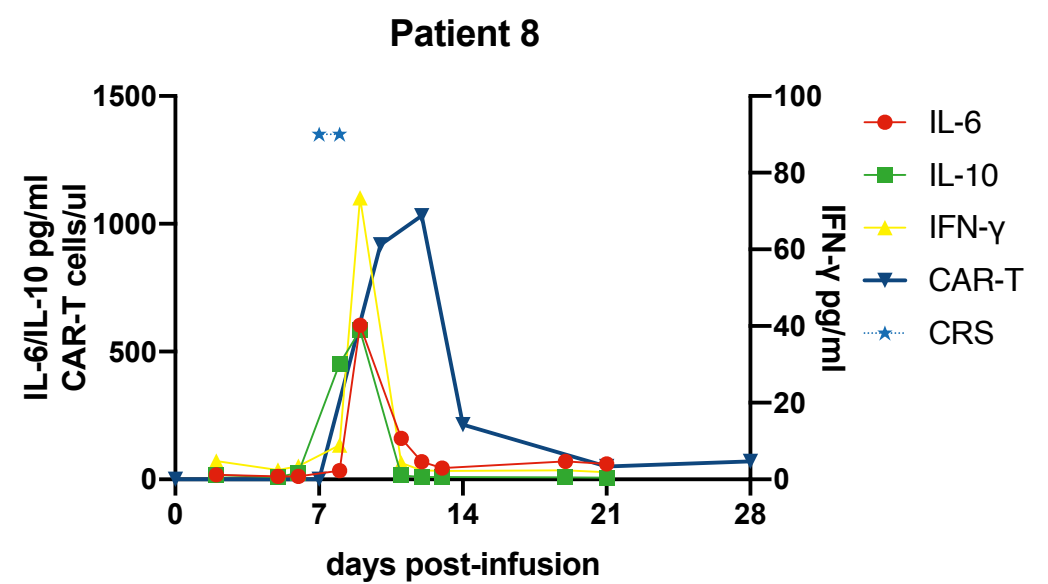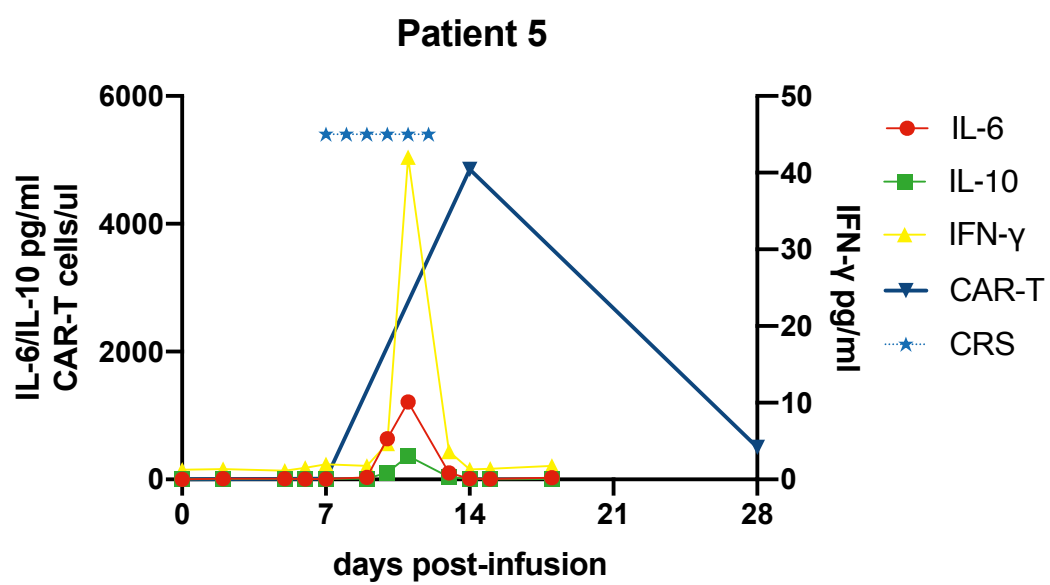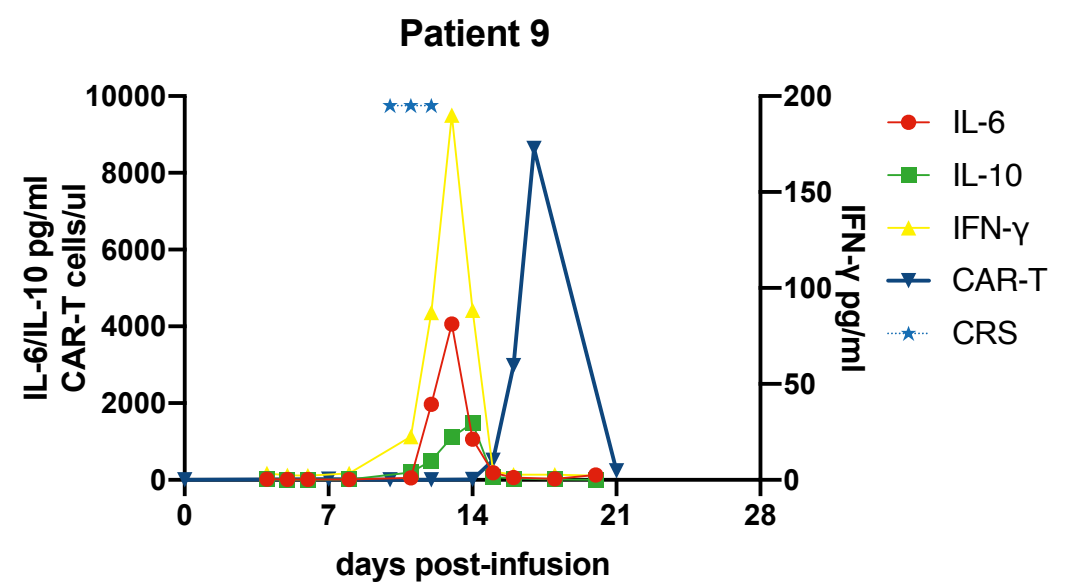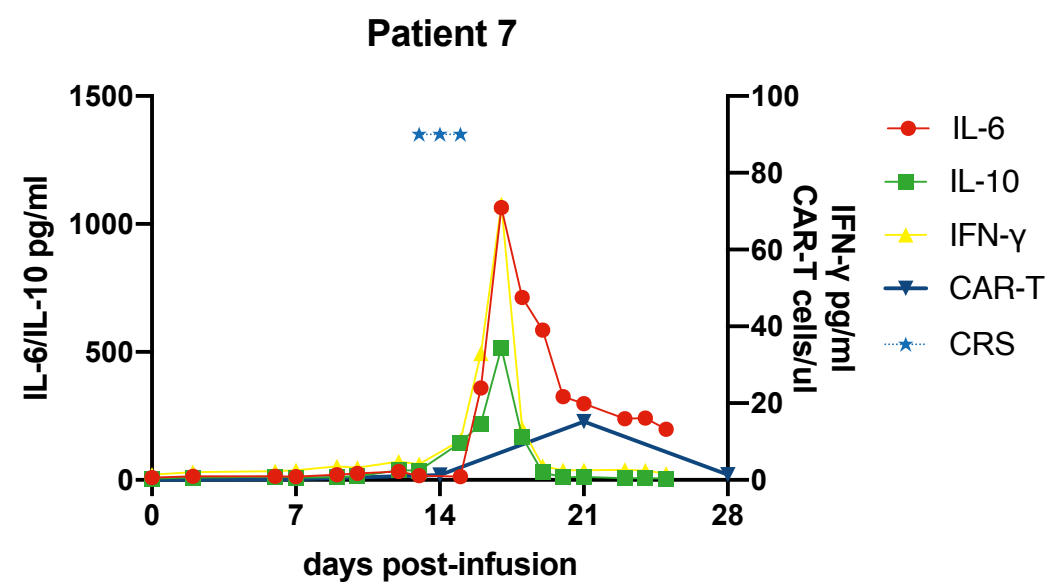

Supplementary Fig 3. In Patients 2, 5, 7, 8 and 9, CAR-T cell numbers (detected by flow cytometry), serum cytokine concentrations at indicated times post infusion and durations of cytokine release syndrome were shown.

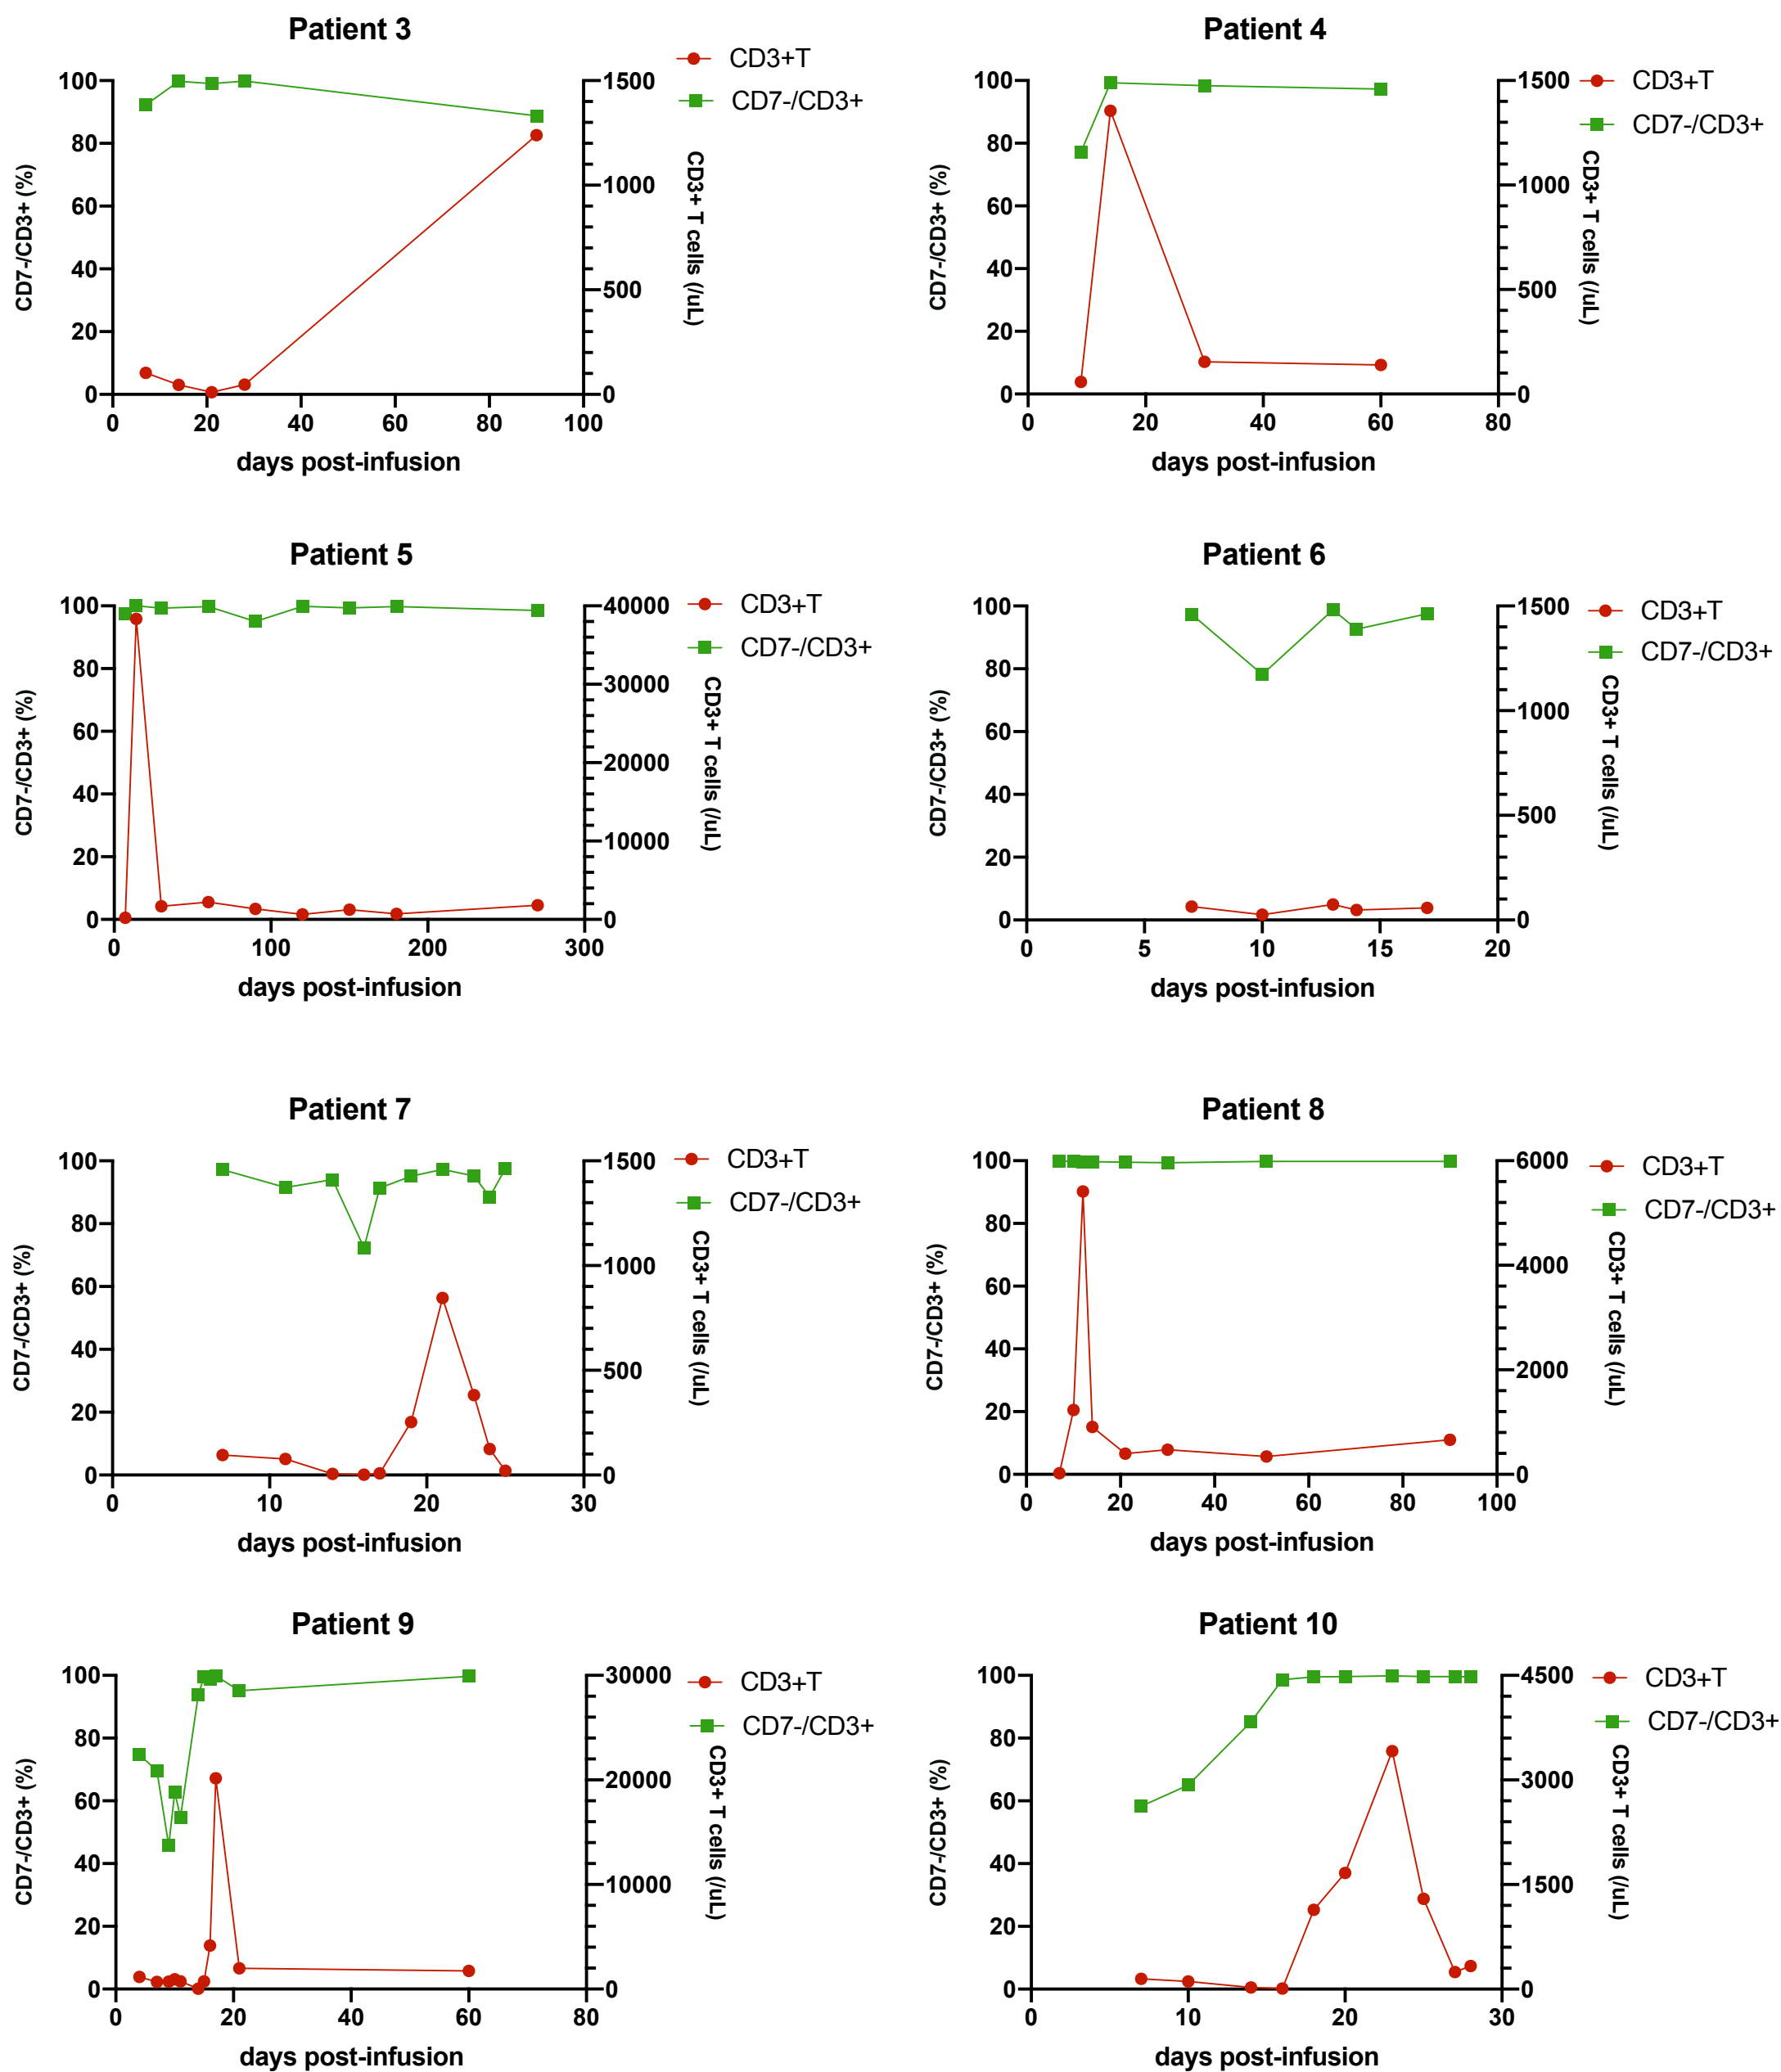

Supplementary Fig 4. Counts of CD3<sup>+</sup>T cell and proportions of CD7<sup>-</sup> T cells in CD3<sup>+</sup> T cells post-infusion.



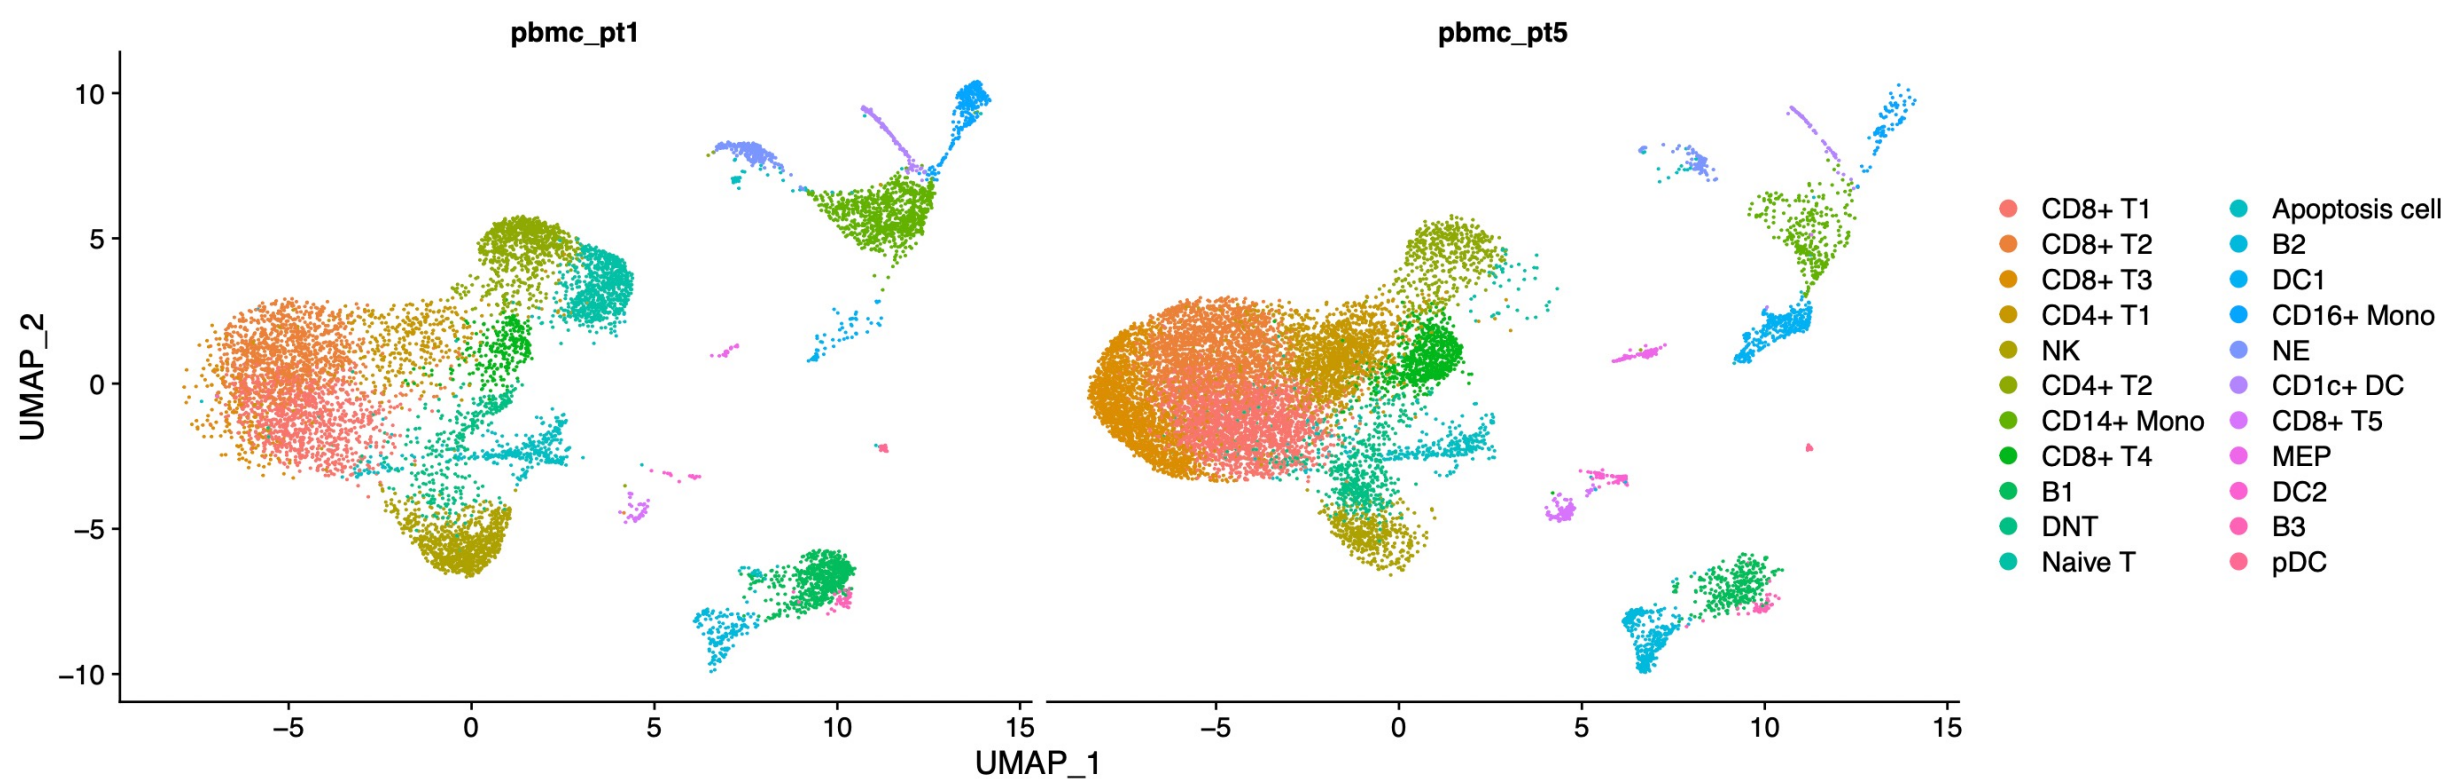

Supplementary Fig 5. Visualization of peripheral blood cells of patient 1 and patient 5 via UMAP.

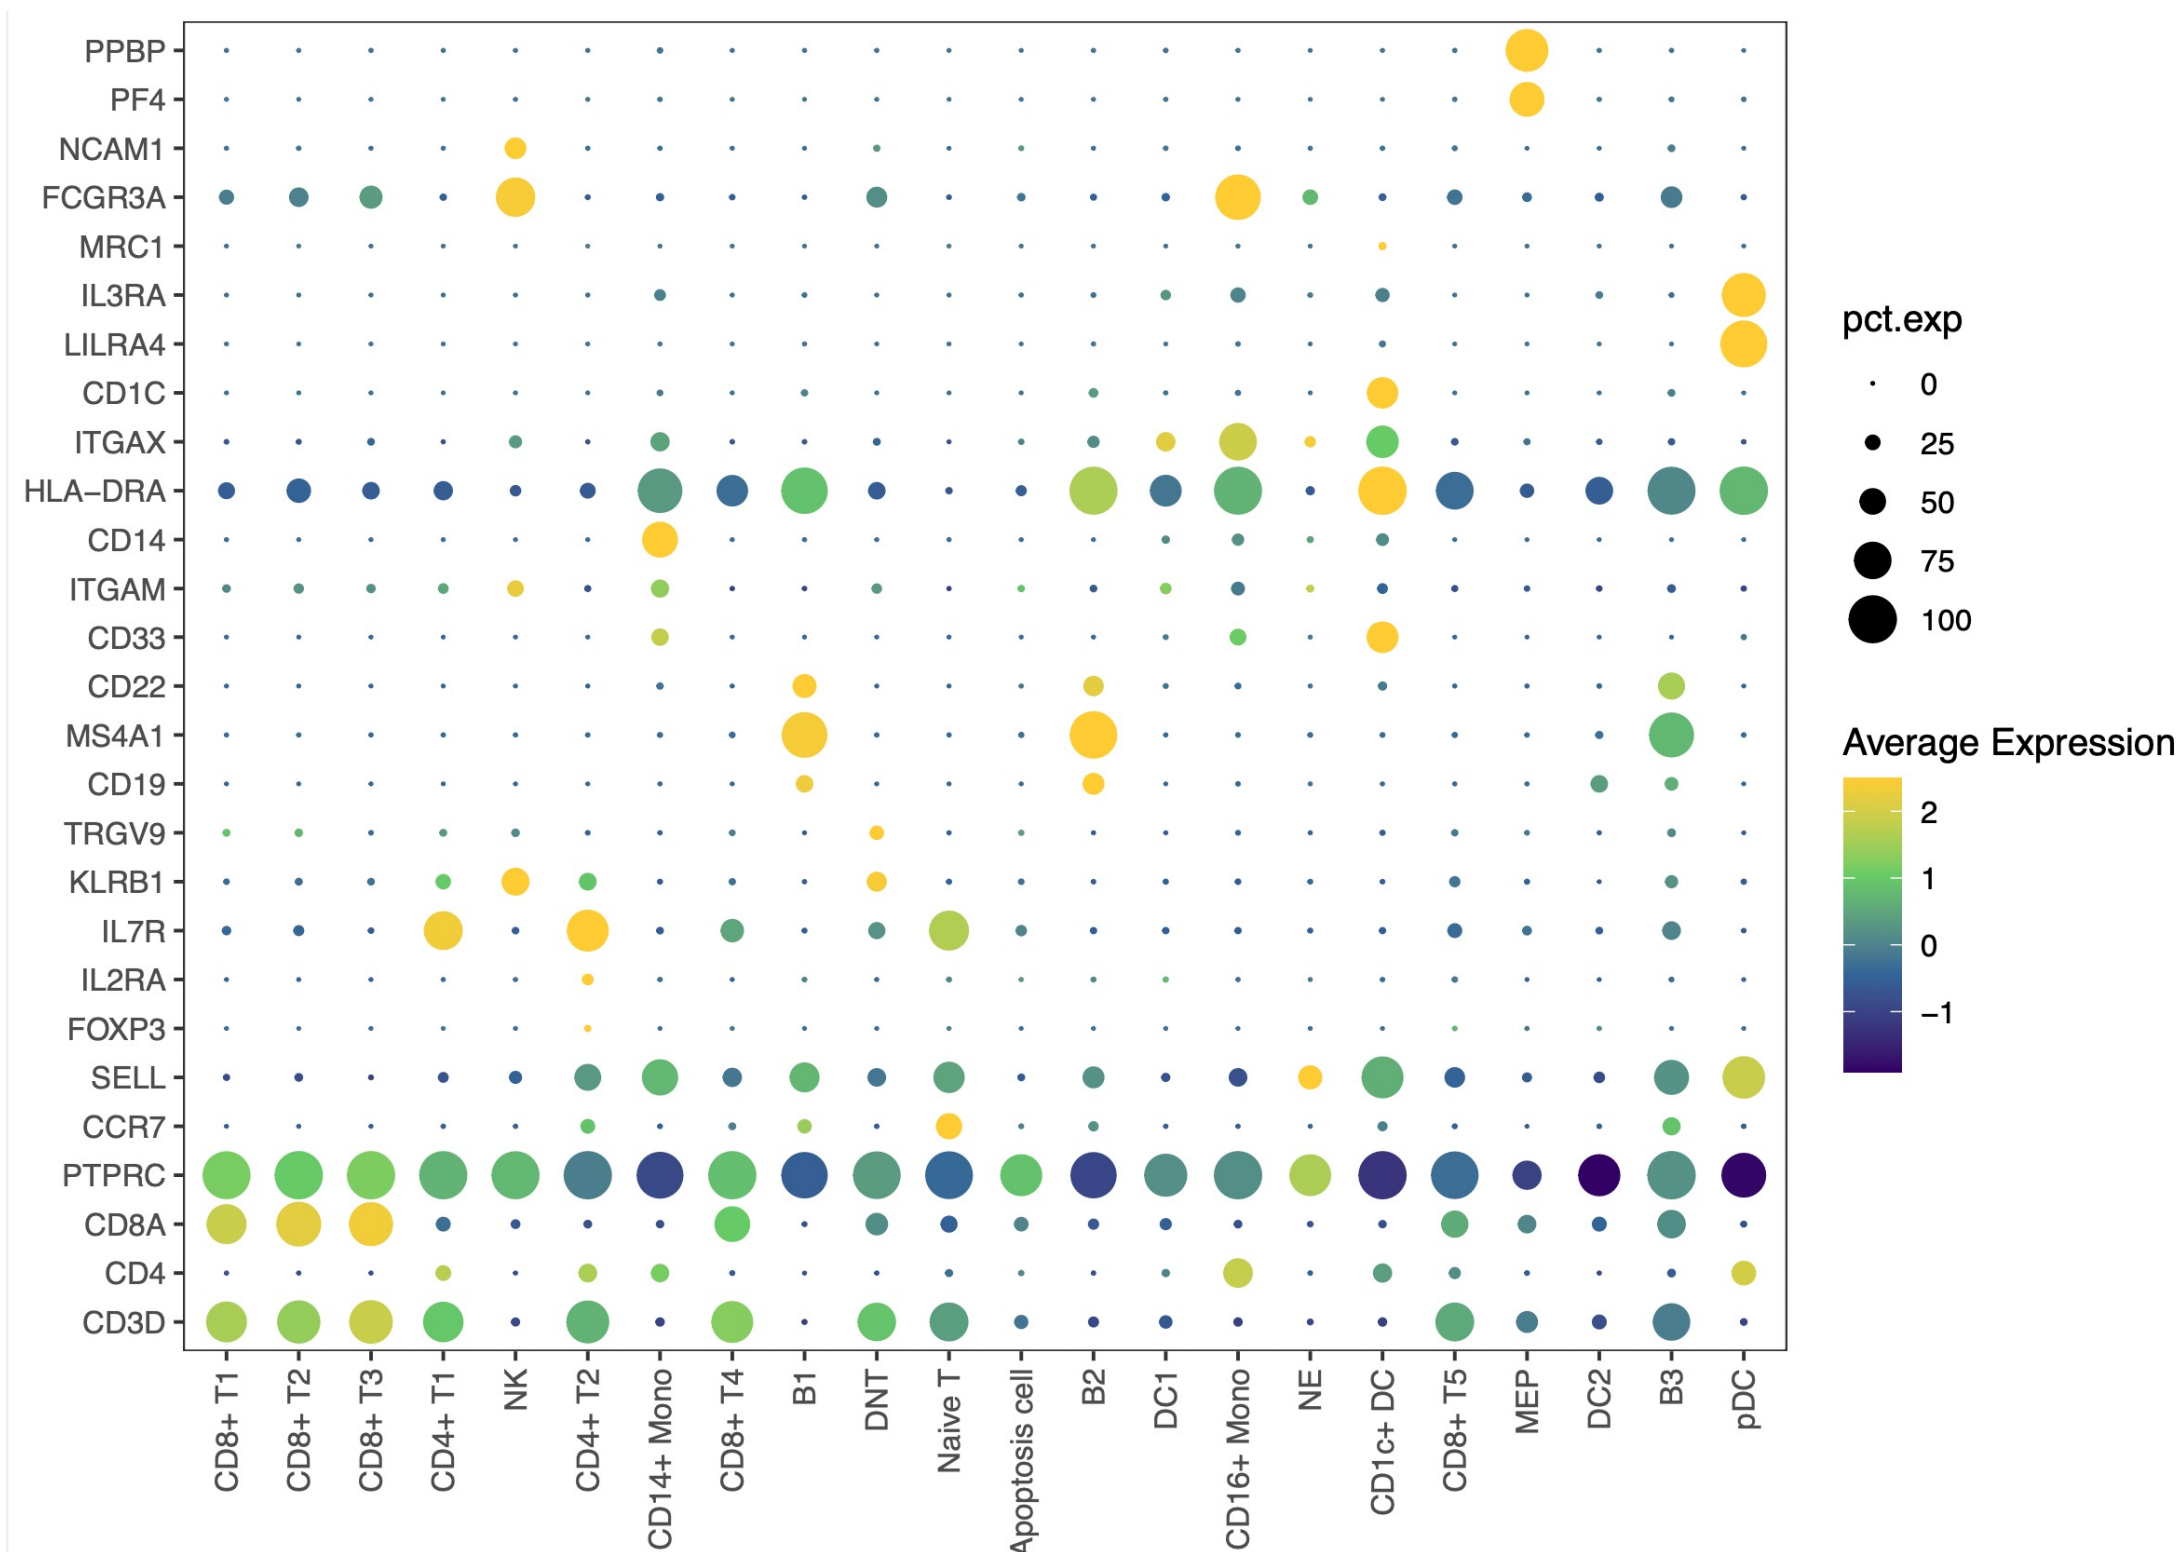

Supplementary Fig 6. The expression of marker genes for annotating cell subsets.



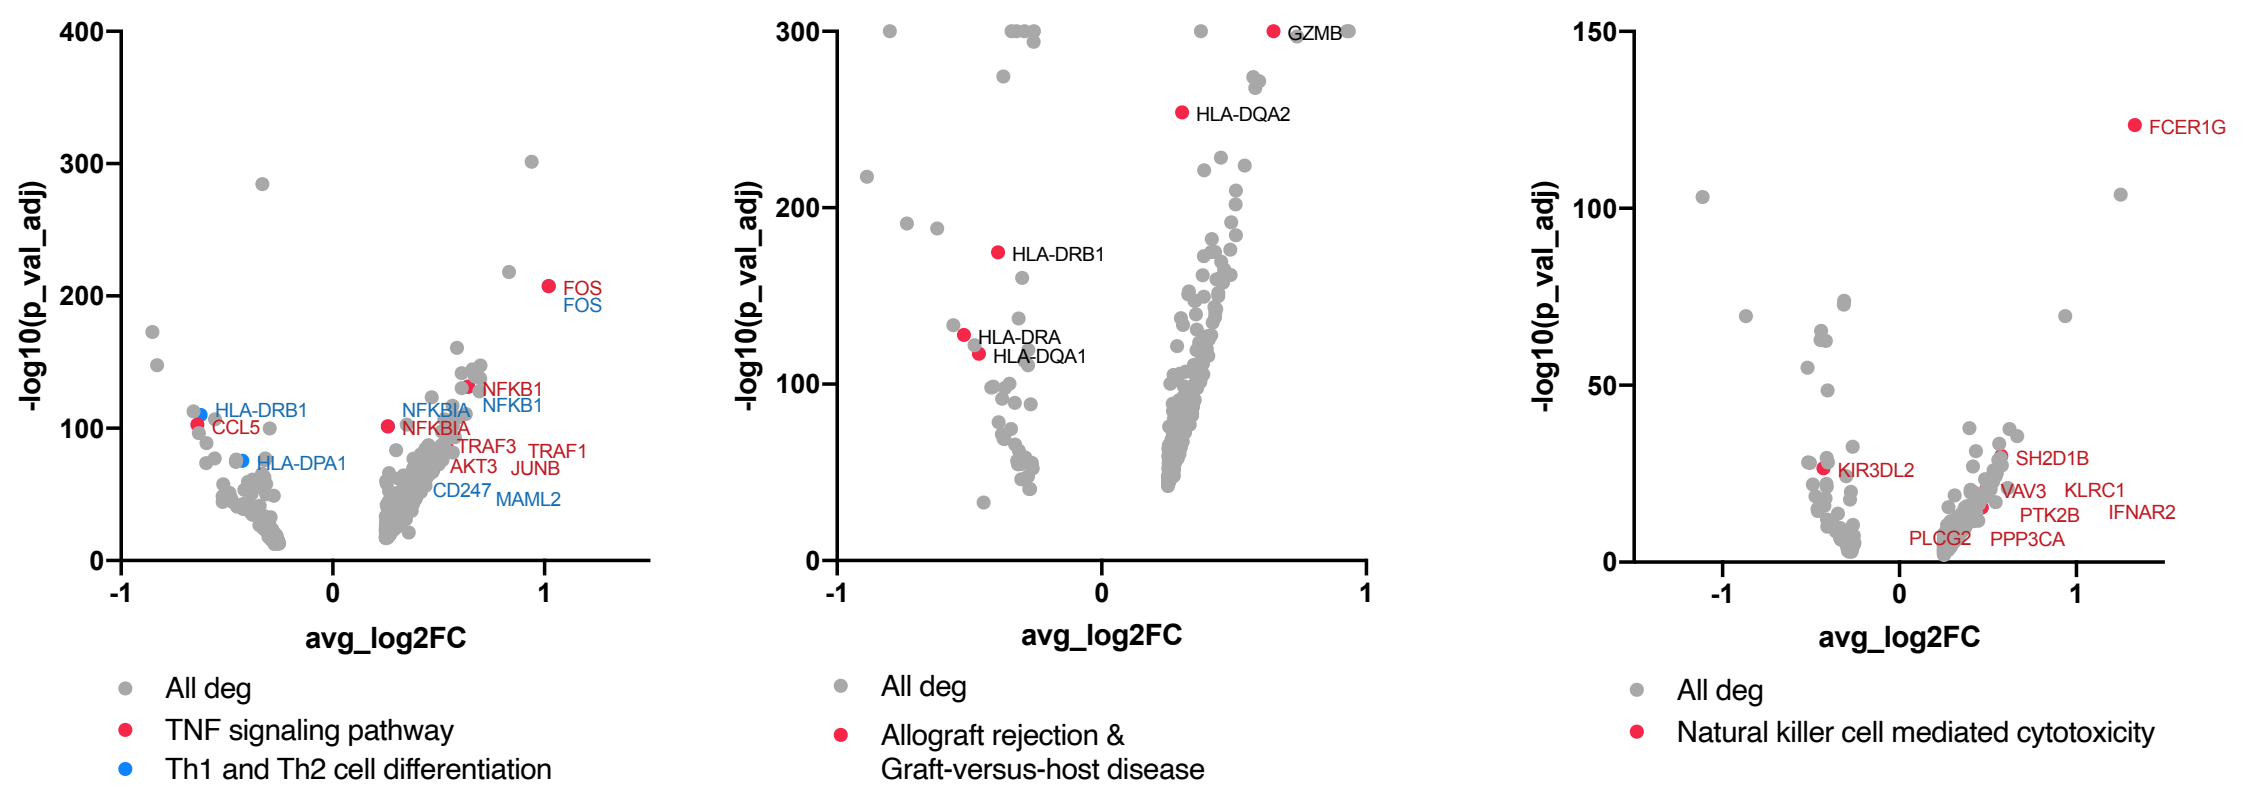

Supplementary Fig 7. Differential expressed genes of CD4+ T (left), CD8+T (middle), NK (right) between two samples. Associated genes of pathways enriched by KEGG database are indicated by colored dots.

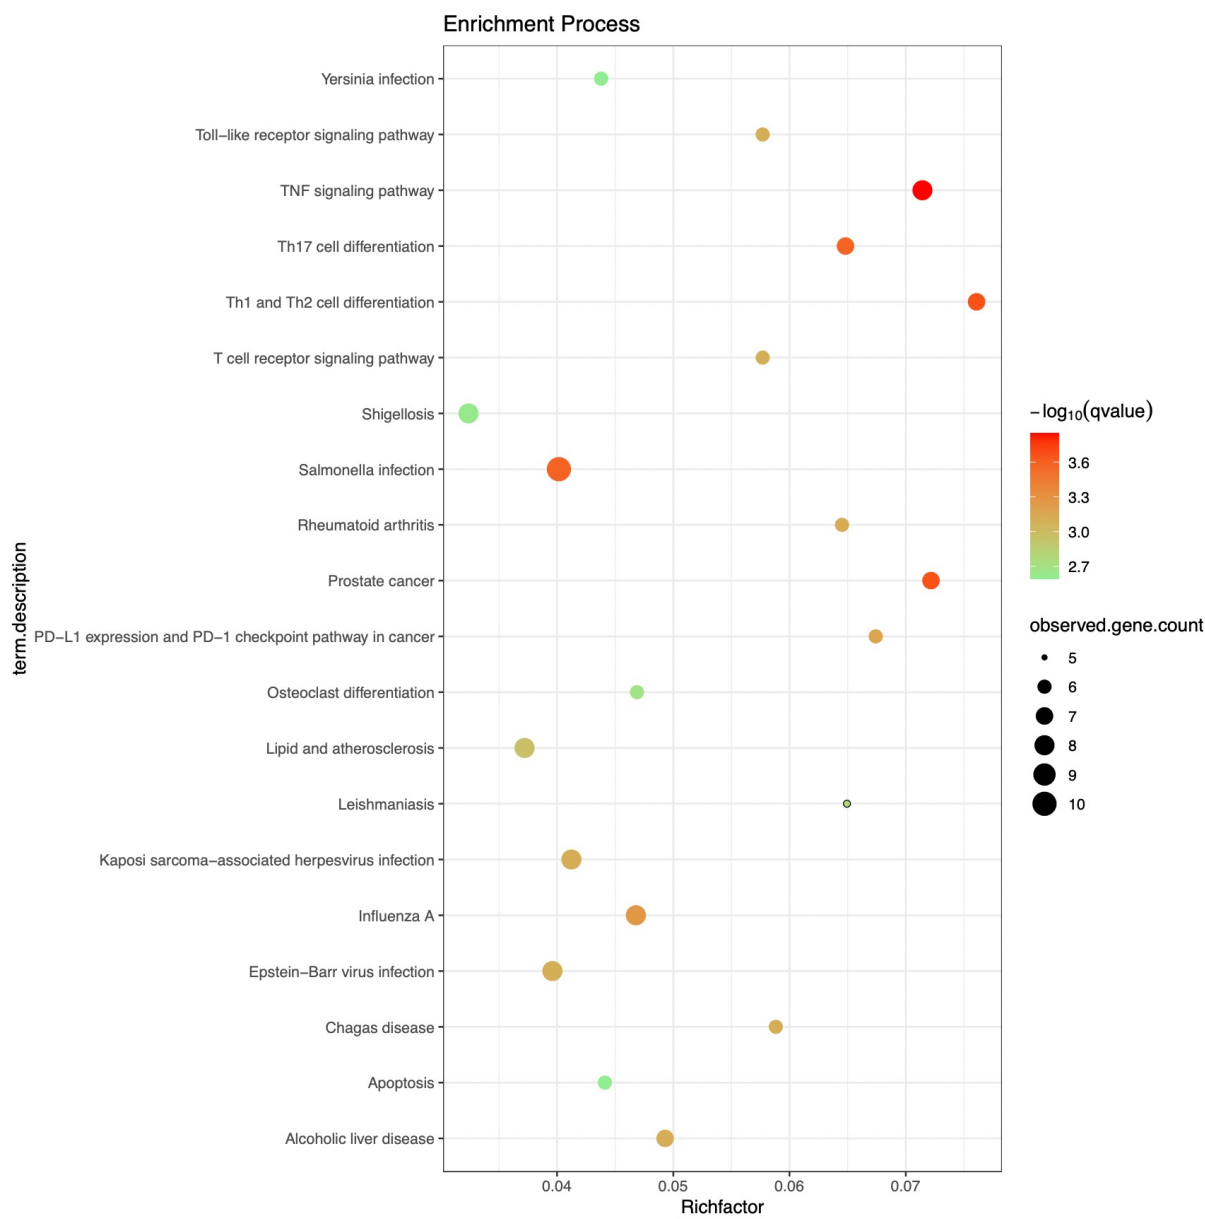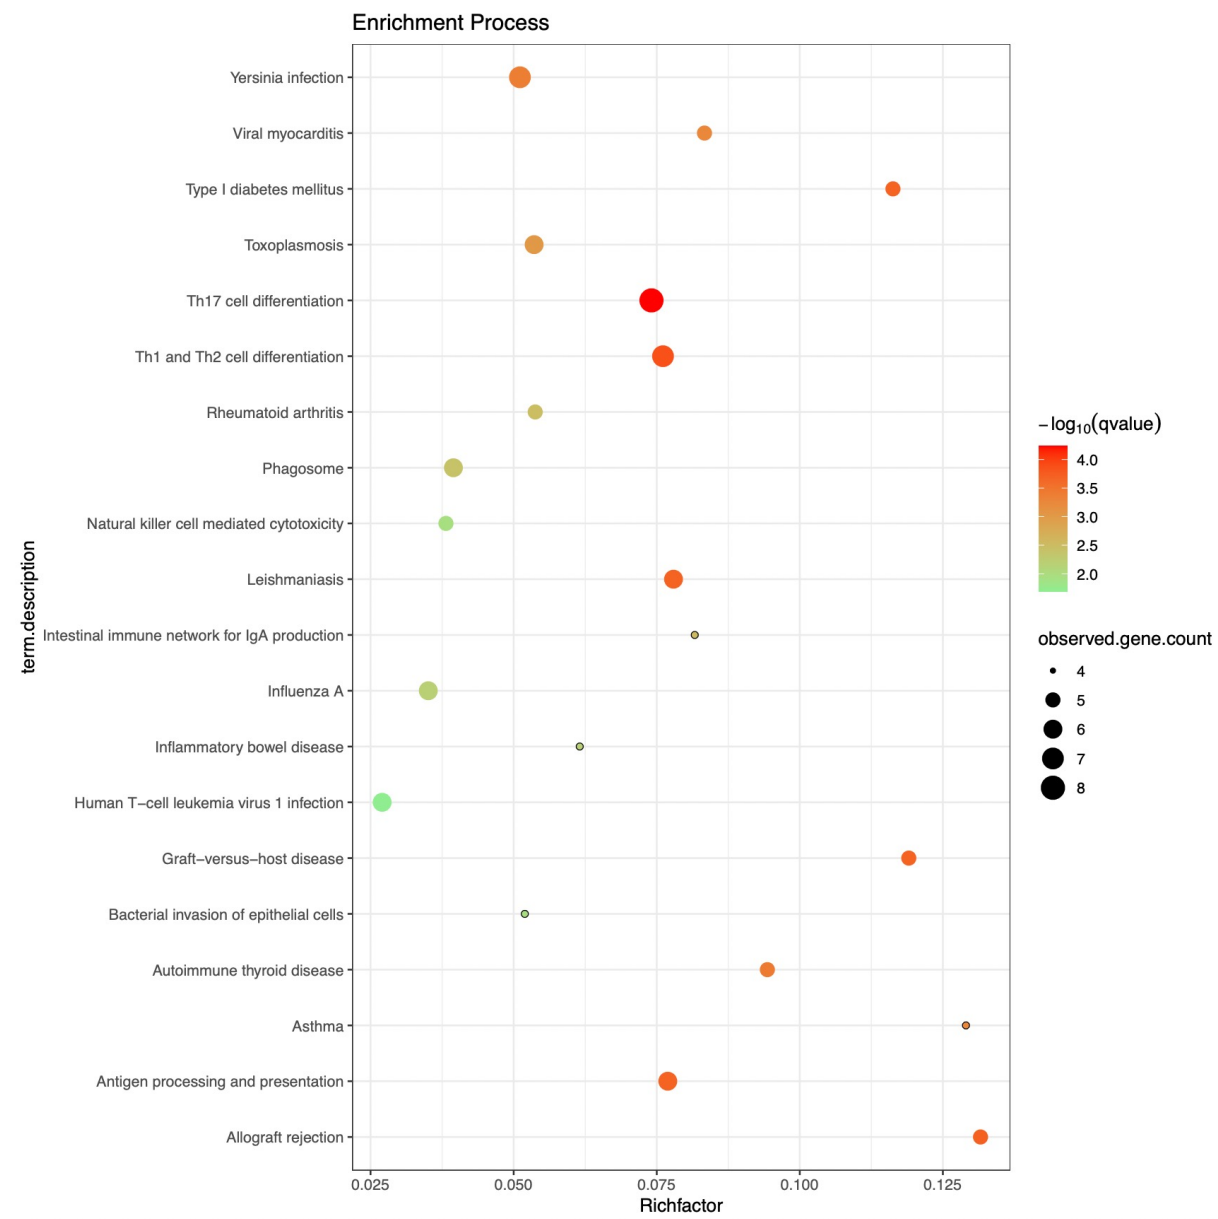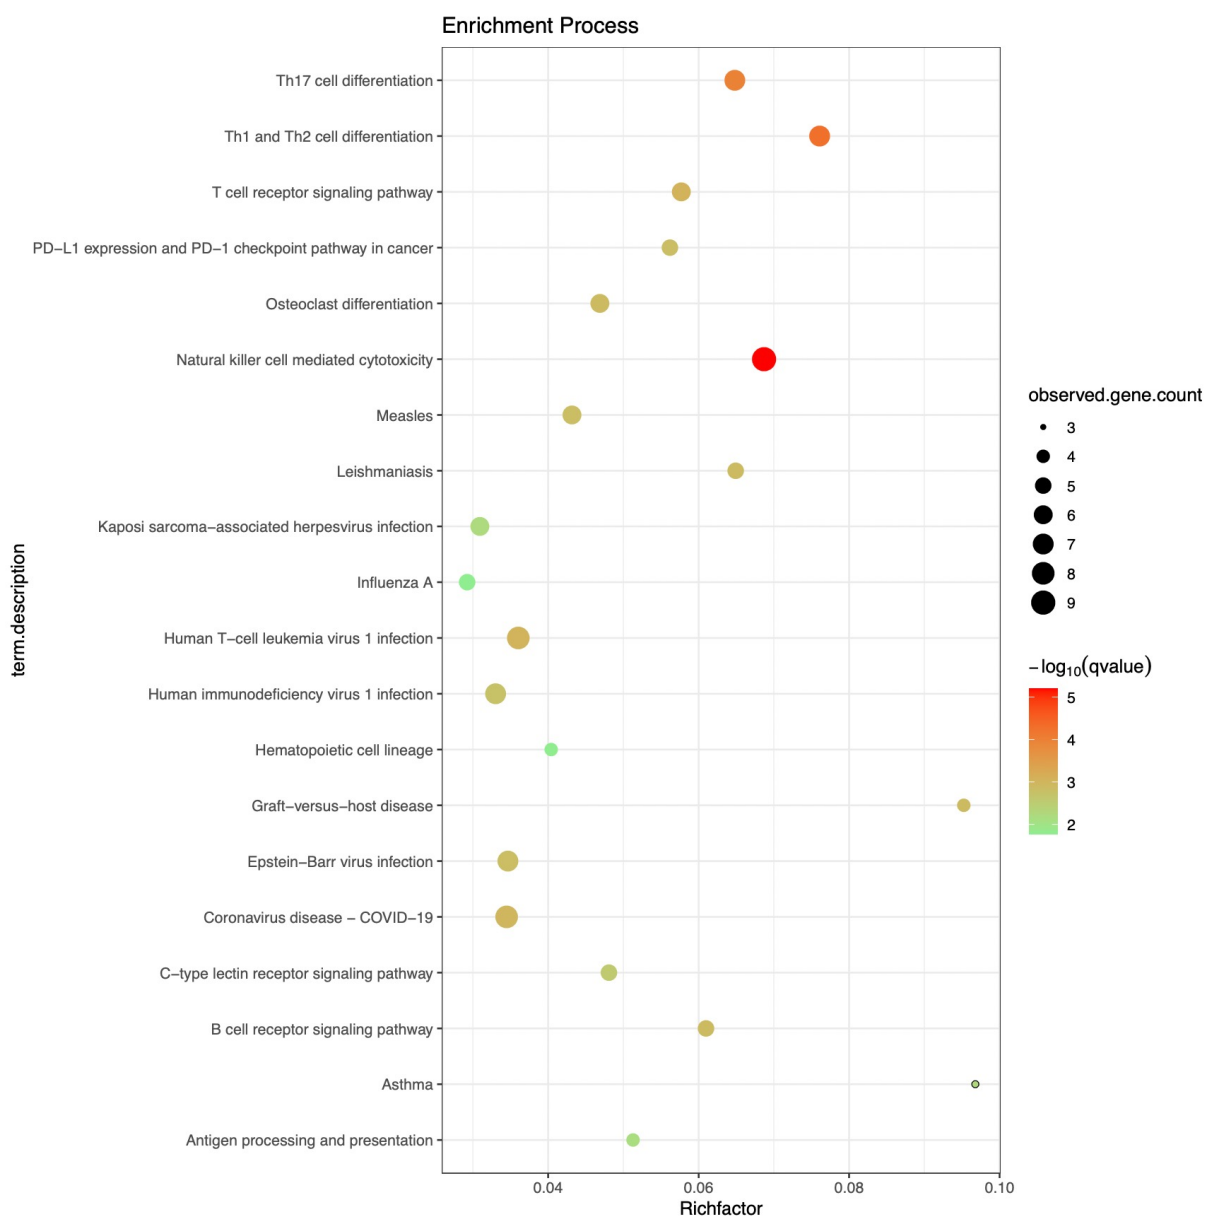

Supplementary Fig 8. Differential expression genes were enriched based on KEGG database. Upper left, CD4<sup>+</sup> T; upper right, CD8<sup>+</sup> T; lower left, NK.

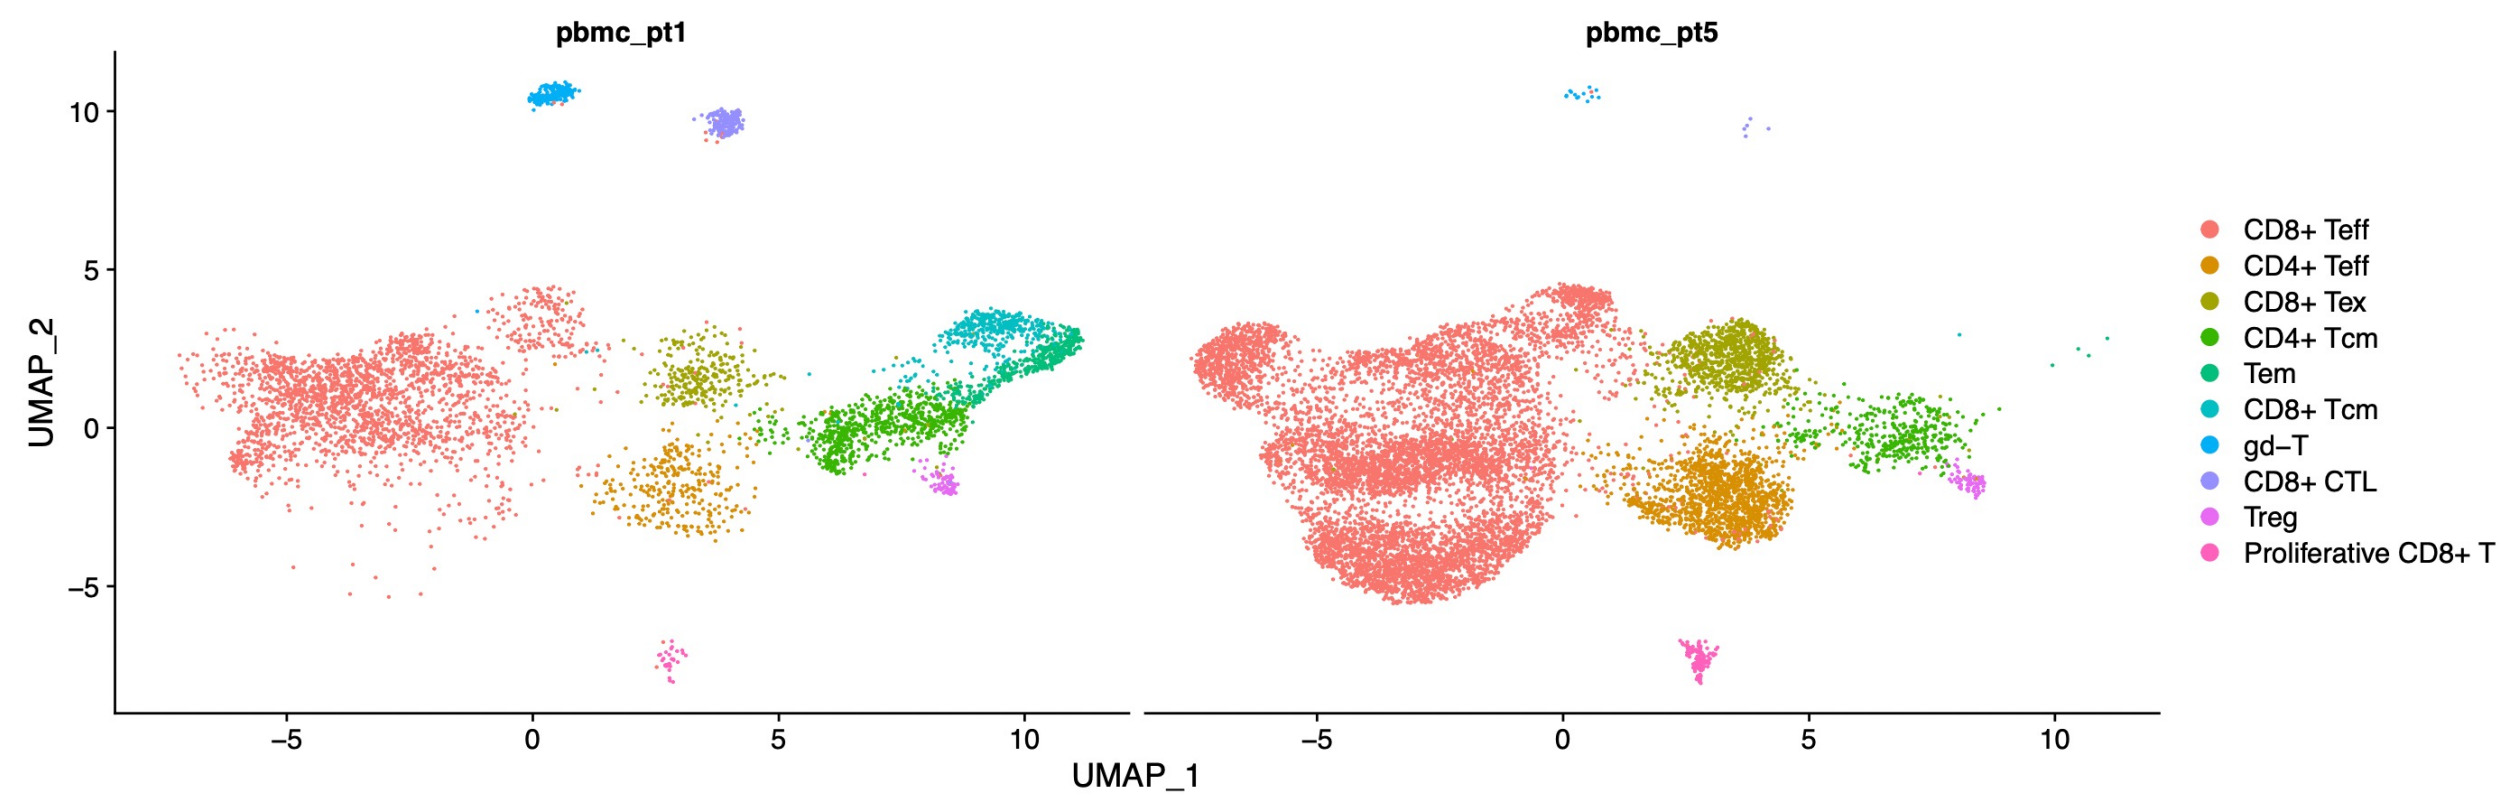

Supplementary Fig 9. Visualization of T cells of patient 1 and patient 5 via UMAP.

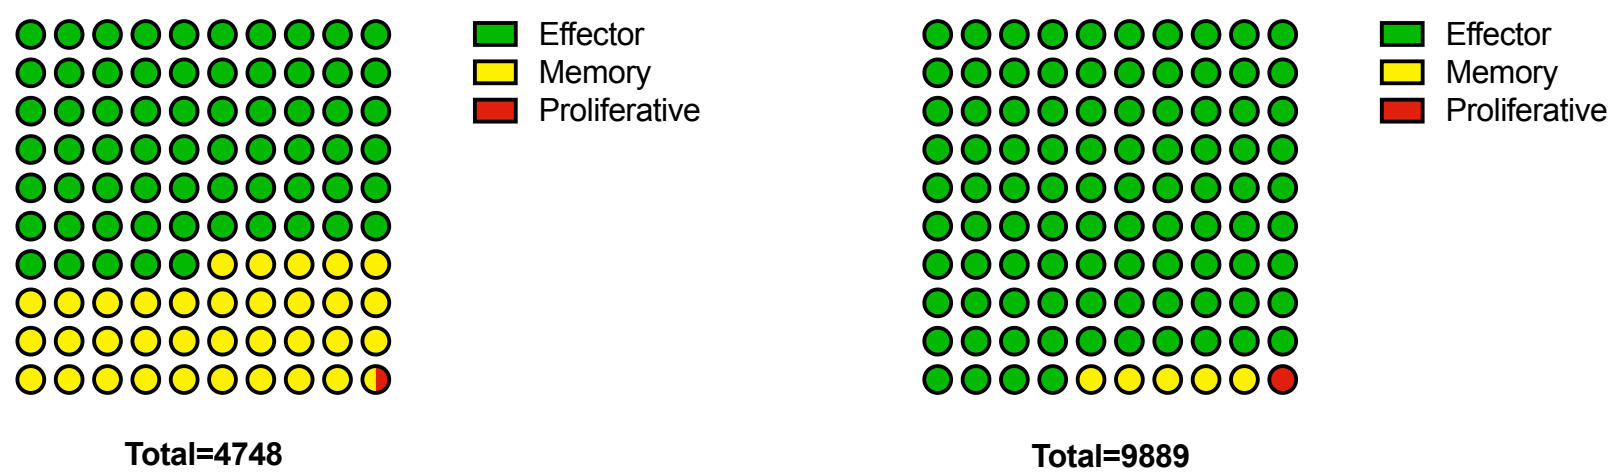

Supplement Fig 10. Distribution of effector, memory and proliferative T cells in patient 1 (left) and patient 5 (right).

## Supplementary Tables

Supplemental Table 1. Characteristics of infusion products

|      | PBMCs<br>source | viability of<br>PBMCs (%) | relative MFI<br>in PBMCs | relative MFI<br>in products | CD4:CD8<br>ratio in<br>PBMCs | CD4:CD8<br>ratio of<br>CAR-T cells | folds of<br>expansion | CAR+ cells<br>(%) | infused<br>CAR-T cells<br>(1*10 <sup>6</sup> /kg) | products |
|------|-----------------|---------------------------|--------------------------|-----------------------------|------------------------------|------------------------------------|-----------------------|-------------------|---------------------------------------------------|----------|
| PT1  | patient         | 94.8                      | 127.37                   | 1.23                        | 1.46                         | 7.81                               | 16.3                  | 65.1              | 1.5                                               | frozen   |
| PT2  | patient         | 97.3                      | 224.40                   | 1.65                        | 0.91                         | 7.11                               | 10.3                  | 81.7              | 2.5                                               | frozen   |
| PT3  | patient         | 97.7                      | 22.54                    | 1.44                        | 0.60                         | 53.72                              | 3.4                   | 40.2              | 1.5                                               | frozen   |
| PT4  | donor           | 100                       | 304.47                   | 1.57                        | 1.20                         | 8.01                               | 14.9                  | 71.2              | 2.5                                               | frozen   |
| PT5  | donor           | 99.7                      | 439.26                   | 1.40                        | 1.59                         | 1.98                               | 81.0                  | 51.6              | 1.5                                               | frozen   |
| PT6  | patient         | 100                       | 424.52                   | 1.47                        | 0.29                         | 1.51                               | 14.0                  | 46.5              | 2.0                                               | frozen   |
| PT7  | donor           | 94.8                      | 187.19                   | 1.28                        | 1.90                         | 5.89                               | 15.4                  | 45.0              | 2.0                                               | frozen   |
| PT8  | donor           | 96.4                      | 475.69                   | 1.35                        | 2.01                         | 3.38                               | 12.4                  | 46.0              | 1.0                                               | frozen   |
| PT9  | donor           | 98.7                      | 345.46                   | 1.24                        | 2.92                         | 55.92                              | 9.0                   | 43.3              | 1.5                                               | frozen   |
| PT10 | patient         | 97.7                      | 275.77                   | 1.26                        | 0.75                         | 5.77                               | 13.3                  | 40.7              | 1.0                                               | frozen   |

MFI, mean fluorescence intensity

Relative MFI = (MFI of PE-CD7) / (MFI of PE-IgG1) in T cells

Supplemental Table 2. Detailed information adverse events

|           | CRS   |                             |       |          |                                            | Infection         |                     |           |              | GVHD  |                             | Others                                         |
|-----------|-------|-----------------------------|-------|----------|--------------------------------------------|-------------------|---------------------|-----------|--------------|-------|-----------------------------|------------------------------------------------|
|           | Grade | Symptoms                    | Onset | Duration | Treatment                                  | Types             | Pathogene           | Location  | Onset        | Grade | symptoms                    |                                                |
| Patient1  | 0     | /                           | /     | /        | /                                          |                   |                     |           |              |       |                             |                                                |
| Patient2  | 2     | fever, hypoxia, hypotension | D10   | 4        | Tocilizumab 320mg.<br>Dexamethasone 42.5mg | Virus<br>Fungus   | EBV<br>C tropicalis | Pneumonia | D102<br>D181 | 1     | cGVHD:<br>hyperpigmentation | Capillary leak syndrome,<br>hypofibrinogenemia |
| Patient3  | 3     | fever, hypoxia, hypotension | D15   | 9        | Dexamethasone 15mg                         | Bacteria          | ABA                 | Unknown   | D19          |       |                             | HLH                                            |
| Patient4  | 1     | fever                       | D10   | 3        | Dexamethasone 30mg                         | Bacteria<br>Virus | SE<br>EBV, CMV      | Pneumonia | D3<br>D62    | 2     | aGVHD:<br>rash, diarrhea    |                                                |
| Patient5  | 1     | fever, myalgia              | D7    | 6        | Tocilizumab 960mg.<br>Dexamethasone 67.5mg |                   |                     |           |              |       |                             | Hypofibrinogenemia                             |
| Patient6  | 0     |                             |       |          |                                            | Bacteria          | SMA                 | Pneumonia | D9           |       |                             |                                                |
| Patient7  | 1     | fever                       | D13   | 3        | Tocilizumab 400mg.<br>Dexamethasone 22.5mg |                   |                     |           |              |       |                             | Capillary leak syndrome,<br>hypofibrinogenemia |
| Patient8  | 2     | fever, hypoxia              | D7    | 2        | Tocilizumab 320mg.<br>Dexamethasone 22.5mg | Virus             | CMV                 | Unknown   | D43          |       |                             | Hypofibrinogenemia                             |
| Patient9  | 2     | fever, hypoxia              | D10   | 4        | Tocilizumab 960mg.<br>Dexamethasone 92.5mg |                   |                     |           |              |       |                             | Hypofibrinogenemia                             |
| Patient10 | 2     | fever, hypotension          | D13   | 5        | Dexamethasone 95mg                         | Fungus            | HPV6, EBV,<br>CMV   | Unknown   | D27          |       |                             | HLH                                            |

CRS, cytokine release syndrome; EBV, Epstein-Barr virus; ABA, Acinetobactor baumannii; SE, Staphylococcus epidermidis; CMV, cytomegalovirus; SMA, Stenotrophomonas maltophilia; HPV, Human papillomavirus; aGVHD, acute graft-versus-host disease; cGVHD, chronic graft-versus-host disease; HLH, hemophagocytic lymphohistiocytosis

Supplemental Table 3. Grades of cytopenia pre-FC, pre-infusion and post-infusion

|           | Anemia |              |               | Thrombocytopenia |              |               | Leukopenia |              |               | Neutropenia |              |               | Lymphocytopenia |              |               |
|-----------|--------|--------------|---------------|------------------|--------------|---------------|------------|--------------|---------------|-------------|--------------|---------------|-----------------|--------------|---------------|
|           | pre-FC | pre-infusion | post-infusion | pre-FC           | pre-infusion | post-infusion | pre-FC     | pre-infusion | post-infusion | pre-FC      | pre-infusion | post-infusion | pre-FC          | pre-infusion | post-infusion |
| Patient1  | 1      | 1            | 1             | 0                | 0            | 1             | 2          | 2            | 4             | 0           | 0            | 4             | 2               | 4            | 4             |
| Patient2  | 1      | 1            | 1             | 1                | 1            | 3             | 0          | 3            | 4             | 0           | 2            | 4             | 0               | 0            | 4             |
| Patient3  | 4      | 4            | 4             | 4                | 4            | 4             | 4          | 4            | 4             | 4           | 4            | 4             | 3               | 4            | 4             |
| Patient4  | 2      | 3            | 3             | 3                | 3            | 4             | 3          | 4            | 4             | 3           | 3            | 4             | 3               | 4            | 4             |
| Patient5  | 0      | 1            | 1             | 0                | 0            | 2             | 0          | 1            | 4             | 0           | 0            | 4             | 0               | 3            | 4             |
| Patient6  | 3      | 3            | 3             | 0                | 0            | 1             | 0          | 4            | 4             | 0           | 4            | 4             | 2               | 4            | 4             |
| Patient7  | 3      | 3            | 3             | 3                | 3            | 4             | 0          | 3            | 4             | 0           | 3            | 4             | 0               | 4            | 4             |
| Patient8  | 1      | 2            | 3             | 1                | 2            | 4             | 0          | 2            | 4             | 2           | 3            | 4             | 0               | 4            | 4             |
| Patient9  | 2      | 2            | 3             | 1                | 1            | 4             | 0          | 3            | 4             | 0           | 2            | 4             | 0               | 3            | 4             |
| Patient10 | 3      | 3            | 3             | 1                | 2            | 4             | 3          | 2            | 4             | 3           | 3            | 4             | 2               | 4            | 4             |

FC, fludarabine and cyclophosphamide
