# Supplementary material for: Allogenic and Autologous anti-CD7 CAR-T cell Therapies in Relapsed or Refractory T-Cell Malignancies
Source: Research Square preprint supplement (doi:10.21203/rs.3.rs-2305563/v1), 2022-11-29
Supplement: Supplementary file 2 [file e6ec75bbc3a7b91e34665228.xlsx]

## Sheet: Sheet1
TABLE 1. Baseline Patient Characteristics
Chracteristics	Total（N=10)	Autologous （N=5)	Donor Derived（N=5)
Median age（range），years	32（16-69）	32（16-69）	23（18-36）
Male，No.（%）	7（70）	3（60）	4（80）
Prognosis of disease，No（%）
Acute T-cell lymphoblastic leukemia	5（50）	2（40）	3（60）
T-cell lymphoblastic lymphoma	3（30）	1（20）	2（40）
Angioimmunoblastic T-cell lymphoma	1（10）	1（20）	0（0）
Mycosis fungoides	1（20）	1（20）	0（0）
Previous therapies
Median lines of therapy（range）	4（2-10）	4（2-4）	5（4-10）
Surgery，No（%）	1（10）	1（20）	0（0）
Allogeneic SCT，No（%）	6（60）	2（40）	4（80）
Donor lymphocyte infusion，No（%）	1（10）	0（0）	1（20）
Primary refractory disease，No（%）	4（40）	3（60）	1（20）
Baseline disease burden
Bone marrow blasts，%
>50	1（10）	1（20）	0（0）
25-50	3（30）	1（20）	2（40）
5-25	2（20）	0（0）	2（40）
<5	4（40）	3（60）	1（20）
Median blasts，range	15（0-53）	0（0-25）	40（15-53）
EMD，No（%）	5（50）	3（60）	2（40）
High-risk phenotype or genotypes	4（40）	2（40）	2（40）
≥Grade 3 cytopenia，No（%）	6（60）	4（80）	2（40）
Bridging therapies	2（20）	1（20）	1（20）
SCT, stem cell transplatation; EMD, extramedullary disease
